# Supplementary material for: Accessing Centnerszwer's quasiracemate – molecular shape controlled molecular recognition
Source: Royal Society of Chemistry journal article supplement (doi:10.1039/c6ra08131b), 2016-01-01
Supplement: c6ra08131b1.pdf [file c6ra08131b1.pdf]

Electronic supplementary information for:

## Accessing Centnerszwer's Quasiracemate – Molecular Shape Controlled Molecular Recognition

Jacqueline M. Spaniol and Kraig A. Wheeler

*Department of Chemistry, Eastern Illinois University, Charleston, IL 61920, USA. E-mail: kawheeler@eiu.edu; Tel: +1 217 581 3119*

### Electronic Supplementary Information

| <b>Table of Contents</b>                                                                        | <b>Page</b> |
|-------------------------------------------------------------------------------------------------|-------------|
| <b>S1-</b> Crystal growth attempts of Centnerszwer's Quasiracemate (+)- <b>1</b> /(-)- <b>2</b> | 2           |
| <b>S2-</b> X-ray Crystallography                                                                | 3-4         |
| <b>S3-</b> Hydrogen-Bond Tables                                                                 | 5           |

## Supporting Information

### S1. Crystal growth attempts of Centnerszwer's Quasiracemate (+)-**1**/(-)-**2**

Crystal growth attempts of Centnerszwer's Quasiracemate (+)-**1**/(-)-**2** were conducted using the slow evaporation method at room temperature and -5°C using a variety of single solvent (acetone, 2-butanone, dichloromethane, ethanol, methanol, and THF) and mixed solvent systems (1:1 dichloromethane:hexanes). Crystal growth experiments also explored the use of the vapor diffusion method (dichloromethane/pentane). In each case, materials retrieved from these studies consisted of either the starting homochiral Cl- or Br-succinic acids or amorphous conglomerate solids as determined by melting point or X-ray diffraction data.

This study also investigated the crystal growth behavior of components (+)-**1** and (-)-**2** from the melt. Samples of (+)-**1** and (-)-**2** were deposited under a cover slip on a glass slide to give an interface of contact between the two components. Heating the sample using an Instec HCS302 hot stage, a single eutectic point could be observed indicating the lack of a quasiracemic phase of (+)-**1**/(-)-**2**. These results were complicated by the possible decomposition of component (-)-**2**.

## S2. X-ray Crystallography

**Table S2. Crystallographic data for 2-chloro and 2-bromosuccinic acid structures.**

|                                                                            | (-)-1                                                                 | (+)-2                                                                 | (+)-1-Im                                                       | (-)-2-Im                                                       |
|----------------------------------------------------------------------------|-----------------------------------------------------------------------|-----------------------------------------------------------------------|----------------------------------------------------------------|----------------------------------------------------------------|
| Crystal data                                                               |                                                                       |                                                                       |                                                                |                                                                |
| CCDC deposit no.                                                           | 1470675                                                               | 1470676                                                               | 1470679                                                        | 1470678                                                        |
| Empirical formula                                                          | C <sub>4</sub> H <sub>5</sub> ClO <sub>4</sub>                        | C <sub>4</sub> H <sub>5</sub> BrO <sub>4</sub>                        | C <sub>17</sub> H <sub>9</sub> ClN <sub>2</sub> O <sub>4</sub> | C <sub>17</sub> H <sub>9</sub> BrN <sub>2</sub> O <sub>4</sub> |
| Crystal System, space group                                                | Orthorhombic<br><i>P</i> 2 <sub>1</sub> 2 <sub>1</sub> 2 <sub>1</sub> | Orthorhombic<br><i>P</i> 2 <sub>1</sub> 2 <sub>1</sub> 2 <sub>1</sub> | triclinic <i>P</i> 1                                           | Monoclinic <i>P</i> 2 <sub>1</sub>                             |
| <i>M</i> <sub>r</sub>                                                      | 152.5                                                                 | 196.99                                                                | 220.61                                                         | 265.07.41                                                      |
| <i>a</i> , Å                                                               | 7.5593(3)                                                             | 7.5647(5)                                                             | 5.0265(3)                                                      | 7.2825(2)                                                      |
| <i>b</i> , Å                                                               | 8.5020(3)                                                             | 8.6337(7)                                                             | 6.1840(3)                                                      | 8.8079(3)                                                      |
| <i>c</i> , Å                                                               | 9.0604(4)                                                             | 9.2380(7)                                                             | 8.1859(4)                                                      | 8.0544(2)                                                      |
| $\alpha$ , deg                                                             | 90                                                                    | 90                                                                    | 93.095(3)                                                      | 90                                                             |
| $\beta$ , deg                                                              | 90                                                                    | 90                                                                    | 102.264(3)                                                     | 108.936(2)                                                     |
| $\gamma$ , deg                                                             | 90                                                                    | 90                                                                    | 106.883(3)                                                     | 90                                                             |
| <i>V</i> , (Å <sup>3</sup> )                                               | 582.30(4)                                                             | 603.35(8)                                                             | 236.10(2)                                                      | 488.68(3)                                                      |
| <i>Z</i> , <i>Z'</i>                                                       | 4, 1                                                                  | 4, 1                                                                  | 1, 1                                                           | 2, 1                                                           |
| <i>D</i> <sub>calc</sub> (g cm <sup>-3</sup> )                             | 1.740                                                                 | 2.169                                                                 | 1.552                                                          | 1.801                                                          |
| $\mu$ (mm <sup>-1</sup> ), rad. type                                       | 5.371, Cu <i>K</i> $\alpha$                                           | 8.870, Cu <i>K</i> $\alpha$                                           | 3.574, Cu <i>K</i> $\alpha$                                    | 5.729, Cu <i>K</i> $\alpha$                                    |
| <i>F</i> <sub>000</sub>                                                    | 312                                                                   | 384                                                                   | 114                                                            | 264                                                            |
| temp (K)                                                                   | 100(2)                                                                | 100(2)                                                                | 100(2)                                                         | 100(2)                                                         |
| Crystal form, color                                                        | plate, colorless                                                      | plate, colorless                                                      | plate, colorless                                               | plate, colorless                                               |
| Crystal size, mm                                                           | 0.10 x 0.24 x 0.26                                                    | 0.03 x 0.08 x 0.09                                                    | 0.31 x 0.29 x 0.08                                             | 0.03 x 0.10 x 0.13                                             |
| Data collection                                                            |                                                                       |                                                                       |                                                                |                                                                |
| Diffractometer                                                             | Bruker Apex II                                                        | Bruker Apex II                                                        | Bruker Apex II                                                 | Bruker Apex II                                                 |
| <i>T</i> <sub>min</sub> / <i>T</i> <sub>max</sub>                          | 0.487/0.753                                                           | 0.475/0.753                                                           | 0.609/0.753                                                    | 0.609/0.753                                                    |
| No. of refls. (meas., uniq., and obs.)                                     | 8317/1068/1060                                                        | 4637/1060/1010                                                        | 5075/1486/1465                                                 | 10932/1761/1740                                                |
| <i>R</i> <sub>int</sub>                                                    | 0.0380                                                                | 0.0401                                                                | 0.0276                                                         | 0.0305                                                         |
| $\theta$ <sub>max</sub> (°)                                                | 68.22                                                                 | 68.24                                                                 | 68.04                                                          | 68.17                                                          |
| Refinement                                                                 |                                                                       |                                                                       |                                                                |                                                                |
| <i>R</i> / <i>R</i> <sup>2</sup> <sub><math>\omega</math></sub> (obs data) | 0.0400/0.1028                                                         | 0.0264/0.0562                                                         | 0.0234/0.0575                                                  | 0.0184/0.0473                                                  |
| <i>R</i> / <i>R</i> <sup>2</sup> <sub><math>\omega</math></sub> (all data) | 0.0401/0.1029                                                         | 0.0284/0.0568                                                         | 0.0238/0.0577                                                  | 0.0187/0.0473                                                  |
| <i>S</i>                                                                   | 1.12                                                                  | 1.06                                                                  | 0.97                                                           | 0.97                                                           |
| No. of refls.                                                              | 5223                                                                  | 1060                                                                  | 1486                                                           | 1740                                                           |
| No. of parameters                                                          | 88                                                                    | 88                                                                    | 134                                                            | 136                                                            |
| $\Delta\rho$ <sub>max/min</sub> (e·Å <sup>-3</sup> )                       | 0.613/-0.242                                                          | 0.607/-0.350                                                          | 0.233/-0.158                                                   | 0.303/-0.210                                                   |
| Flack- <i>x</i>                                                            | 0.08(4)                                                               | 0.02(2)                                                               | 0.052(19)                                                      | 0.019(9)                                                       |

**Table S2. Crystallographic data for 2-chloro and 2-bromosuccinic acid structures. (continued)**

|                                                                   | (±)-1·1m <sup>1</sup>                                         | (±)-2·1m                                                      | (+)-1/(-)-2·1m                                                    | (+)-1/(-)-2·BPDO                                                              |
|-------------------------------------------------------------------|---------------------------------------------------------------|---------------------------------------------------------------|-------------------------------------------------------------------|-------------------------------------------------------------------------------|
| <b>Crystal data</b>                                               |                                                               |                                                               |                                                                   |                                                                               |
| CCDC deposit no.                                                  | 1211267                                                       | 1470677                                                       | 1470680                                                           | 1470681                                                                       |
| Empirical formula                                                 | C <sub>7</sub> H <sub>9</sub> ClN <sub>2</sub> O <sub>4</sub> | C <sub>7</sub> H <sub>9</sub> BrN <sub>2</sub> O <sub>4</sub> | C <sub>14</sub> H <sub>18</sub> BrClN <sub>4</sub> O <sub>8</sub> | C <sub>29</sub> H <sub>36</sub> N <sub>2</sub> O <sub>12</sub> S <sub>3</sub> |
| Crystal System, space group                                       | triclinic <i>P</i> $\bar{1}$                                  | triclinic <i>P</i> $\bar{1}$                                  | triclinic <i>P</i> 1                                              | triclinic <i>P</i> 1                                                          |
| <i>M<sub>r</sub></i>                                              | 220.61                                                        | 265.07                                                        | 485.68                                                            | 725.89                                                                        |
| <i>a</i> , Å                                                      | 8.084(3)                                                      | 8.0994(4)                                                     | 8.1185(8)                                                         | 7.7692(3)                                                                     |
| <i>b</i> , Å                                                      | 8.253(5)                                                      | 8.3605(4)                                                     | 8.2996(8)                                                         | 10.7311(4)                                                                    |
| <i>c</i> , Å                                                      | 8.990(5)                                                      | 8.8967(7)                                                     | 8.8998(9)                                                         | 14.5005(13)                                                                   |
| $\alpha$ , deg                                                    | 101.10(5)                                                     | 101.264(3)                                                    | 100.911(5)                                                        | 102.275(3)                                                                    |
| $\beta$ , deg                                                     | 107.72(4)                                                     | 102.378(3)                                                    | 106.931(5)                                                        | 93.038(2)                                                                     |
| $\gamma$ , deg                                                    | 117.47(4)                                                     | 106.468(3)                                                    | 117.952(4)                                                        | 107.620(3)                                                                    |
| <i>V</i> , (Å <sup>3</sup> )                                      | 465.93                                                        | 467.59(5)                                                     | 467.58(8)                                                         | 746.66(6)                                                                     |
| <i>Z</i> , <i>Z'</i>                                              | 1, 1                                                          | 2, 1                                                          | 1, 1                                                              | 1, 1                                                                          |
| <i>D<sub>calc</sub></i> (g cm <sup>-3</sup> )                     | 1.572                                                         | 1.883                                                         | 1.725                                                             | 1.614                                                                         |
| $\mu$ (mm <sup>-1</sup> ), rad. type                              |                                                               | 5.987, Cu <i>K</i> $\alpha$                                   | 4.798, Cu <i>K</i> $\alpha$                                       | 3.337, Cu <i>K</i> $\alpha$                                                   |
| <i>F</i> <sub>000</sub>                                           |                                                               | 264                                                           | 246                                                               | 370                                                                           |
| temp (K)                                                          | 297(2)                                                        | 100(2)                                                        | 100(2)                                                            | 100(2)                                                                        |
| Crystal form, color                                               |                                                               | prism, colorless                                              | prism, colorless                                                  | plate, colorless                                                              |
| Crystal size, mm                                                  |                                                               | 0.07 x 0.08 x 0.21                                            | 0.09 x 0.11 x 0.19                                                | 0.04 x 0.09 x 0.16                                                            |
| <b>Data collection</b>                                            |                                                               |                                                               |                                                                   |                                                                               |
| Diffractometer                                                    |                                                               | Bruker Apex II                                                | Bruker Apex II                                                    | Bruker Apex II                                                                |
| <i>T</i> <sub>min</sub> / <i>T</i> <sub>max</sub>                 |                                                               | 0.553/0.911                                                   | 0.661/0.753                                                       | 0.626/0.753                                                                   |
| No. of refls. (meas., uniq., and obs.)                            |                                                               | 10122/1670/1605                                               | 10562/2949/2936                                                   | 24878/2680/2263                                                               |
| <i>R</i> <sub>int</sub>                                           |                                                               | 0.0420                                                        | 0.0240                                                            | 0.0456                                                                        |
| $\theta$ <sub>max</sub> (°)                                       |                                                               | 68.23                                                         | 68.23                                                             | 68.22                                                                         |
| <b>Refinement</b>                                                 |                                                               |                                                               |                                                                   |                                                                               |
| <i>R/R</i> <sup>2</sup> <sub><math>\omega</math></sub> (obs data) |                                                               | 0.0425/0.1140                                                 | 0.0331/0.0831                                                     | 0.0345/0.0794                                                                 |
| <i>R/R</i> <sup>2</sup> <sub><math>\omega</math></sub> (all data) |                                                               | 0.0436/0.1158                                                 | 0.0333/0.0832                                                     | 0.0361/0.0803                                                                 |
| <i>S</i>                                                          |                                                               | 1.10                                                          | 0.98                                                              | 1.06                                                                          |
| No. of refls.                                                     |                                                               | 1670                                                          | 2949                                                              | 2680                                                                          |
| No. of parameters                                                 |                                                               | 136                                                           | 272                                                               | 458                                                                           |
| $\Delta\rho$ <sub>max/min</sub> (e·Å <sup>-3</sup> )              |                                                               | 1.786/-0.752                                                  | 0.387/-0.298                                                      | 0.310/-0.277                                                                  |
| Flack- <i>x</i>                                                   |                                                               | -                                                             | 0.03(3)                                                           | 0.018(18)                                                                     |

### S3. Hydrogen-Bond Tables

**Table S3. Hydrogen bond parameters for 2-chloro and 2-bromosuccinic acid structures.**

| compound                              | $D-H\cdots A$             | $D-H$ (Å) | $H\cdots A$ (Å) | $D\cdots A$ (Å) | $D-H\cdots A$ (°) |
|---------------------------------------|---------------------------|-----------|-----------------|-----------------|-------------------|
| (-)- <b>1</b>                         | O1-H...O4 <sup>i</sup>    | 0.84(3)   | 1.81(3)         | 2.649(4)        | 173(6)            |
|                                       | O3-H...O2 <sup>ii</sup>   | 0.85(3)   | 1.82(3)         | 2.663(4)        | 174(6)            |
| (+) - <b>2</b>                        | O1-H...O4 <sup>ii</sup>   | 0.84(3)   | 1.80(3)         | 2.647(4)        | 175(5)            |
|                                       | O3-H...O2 <sup>i</sup>    | 0.85(3)   | 1.81(3)         | 2.653(4)        | 172(5)            |
| (+) - <b>1</b> ·Im                    | N1-H...O1 <sup>iii</sup>  | 0.83(2)   | 1.92(2)         | 2.735(3)        | 166(4)            |
|                                       | O3-H...O2 <sup>iv</sup>   | 0.83(2)   | 1.77(2)         | 2.595(2)        | 176(4)            |
|                                       | N2-H...O2 <sup>v</sup>    | 0.88(2)   | 1.87(2)         | 2.752(3)        | 177(4)            |
| (-) - <b>2</b> ·Im                    | N1-H...O1 <sup>iii</sup>  | 0.83(3)   | 1.89(3)         | 2.670(4)        | 155(4)            |
|                                       | O3-H...O2 <sup>iv</sup>   | 0.82(3)   | 1.77(3)         | 2.591(4)        | 175(5)            |
|                                       | N2-H...O2 <sup>vi</sup>   | 0.84(3)   | 1.91(3)         | 2.743(4)        | 169(5)            |
| (±) - <b>2</b> ·Im                    | N1-H...O1 <sup>iii</sup>  | 0.84(3)   | 1.91(2)         | 2.719(4)        | 162(5)            |
|                                       | O3-H...O2 <sup>ii</sup>   | 0.85(3)   | 1.69(2)         | 2.538(3)        | 174(5)            |
|                                       | N2-H...O2 <sup>vii</sup>  | 0.85(3)   | 1.90(2)         | 2.734(4)        | 171(5)            |
| (+) - <b>1</b> / (-) - <b>2</b> ·Im   | N1-H...O1 <sup>iii</sup>  | 0.85(3)   | 1.88(3)         | 2.728(7)        | 175(9)            |
|                                       | O4-H...O1 <sup>iv</sup>   | 0.84(3)   | 1.73(2)         | 2.568(7)        | 171(8)            |
|                                       | N2-H...O2 <sup>viii</sup> | 0.83(3)   | 1.97(4)         | 2.741(7)        | 154(6)            |
|                                       | N3-H...O5 <sup>iii</sup>  | 0.82(3)   | 1.94(3)         | 2.744(7)        | 165(8)            |
|                                       | O8-H...O5 <sup>i</sup>    | 0.84(3)   | 1.70(3)         | 2.535(7)        | 170(8)            |
|                                       | N4-H...O6 <sup>vii</sup>  | 0.83(3)   | 1.88(3)         | 2.715(7)        | 177(7)            |
|                                       | O1-H...O9 <sup>iii</sup>  | 0.86(3)   | 1.73(3)         | 2.561(7)        | 160(6)            |
| (+) - <b>1</b> / (-) - <b>2</b> ·BPDO | O3-H...O10 <sup>ix</sup>  | 0.85(3)   | 1.75(3)         | 2.574(7)        | 163(7)            |
|                                       | O5-H...O11 <sup>iii</sup> | 0.86(3)   | 1.72(3)         | 2.561(7)        | 166(6)            |
|                                       | O7-H...O12 <sup>x</sup>   | 0.86(3)   | 1.71(3)         | 2.562(7)        | 175(7)            |

Symmetry codes: (i)  $x-1, y, z$ ; (ii)  $x+1, y, z$ ; (iii)  $x, y, z$ ; (iv)  $x, y, z+1$ ; (v)  $x+1, x-1, z$ ; (vi)  $x, y+1, z$ ; (vii)  $x-1, y-1, z-1$ ; (viii)  $x+1, y+1, z+1$ ; (ix)  $x+1, y+2, z+1$ ; (x)  $x-1, y-2, z-1$ .
